# Supplementary material for: Some mechanistic underpinnings of molecular adaptations of SARS-COV-2 spike protein by integrating candidate adaptive polymorphisms with protein dynamics
Source: eLife. 2024 May 7;12:RP92063. doi: 10.7554/eLife.92063 (PMC11076047; doi:10.7554/eLife.92063)
Supplement: Figure 3—source data 1. — Sequence MN90894.3 is used as the wild-type (reference) sequence. For each different variant, residue positions matching the reference sequence are shown in blue, while locations where the residue differs from the reference sequence are shown in yellow. For S protein locations not shown here, all variants presented have the same amino acid type as the reference sequence. [file elife-92063-fig3-data1.xlsx]

## Sheet: Sheet1
	18	19	20	26	27	67	80	83	95	138	142	145	146	158	183	190	212	213	215	252	339	346	368	371	373	375	376	405	408	417	440	445
Wild-type (MN90894.3)	L	T	T	P	A	A	D	V	T	D	G	Y	H	R	Q	R	L	V	D	G	G	R	L	S	S	S	T	D	R	K	N	V
Alpha	L	T	T	P	A	A	D	V	T	D	G	Y	H	R	Q	R	L	V	D	G	G	R	L	S	S	S	T	D	R	K	N	V
Beta	L	T	T	P	A	A	A	V	T	D	G	Y	H	R	Q	R	L	V	G	G	G	R	L	S	S	S	T	D	R	N	N	V
Gamma	F	T	N	S	A	A	D	V	T	Y	G	Y	H	R	Q	S	L	V	D	G	G	R	L	S	S	S	T	D	R	T	N	V
Delta	L	R	T	P	A	A	D	V	T	D	G	Y	H	G	Q	R	L	V	D	G	G	R	L	S	S	S	T	D	R	K	N	V
Omicron	L	T	T	P	A	V	D	V	I	D	G	D	H	R	Q	R	I	V	D	G	D	R	L	L	P	F	T	D	R	N	K	V
Omicron XBB 1.5	L	I	T	P	S	A	D	A	T	D	D	Y	Q	R	E	R	L	E	D	V	H	T	I	F	P	F	A	N	S	N	K	P
	446	452	460	477	478	484	486	490	493	496	498	501	505	547	570	614	655	679	681	701	716	764	796	856	950	954	969	981	982	1027	1118	1176
Wild-type (MN90894.3)	G	L	N	S	T	E	F	F	Q	G	Q	N	Y	T	A	D	H	N	P	A	T	N	D	N	D	Q	N	L	S	T	D	V
Alpha	G	L	N	S	T	E	F	F	Q	G	Q	Y	Y	T	D	G	H	N	H	A	I	N	D	N	D	Q	N	L	A	T	H	V
Beta	G	L	N	S	T	K	F	F	Q	G	Q	Y	Y	T	A	G	H	N	P	V	T	N	D	N	D	Q	N	L	S	T	D	V
Gamma	G	L	N	S	T	K	F	F	Q	G	Q	Y	Y	T	A	G	Y	N	P	A	T	N	D	N	D	Q	N	L	S	I	D	F
Delta	G	R	N	S	K	E	F	F	Q	G	Q	N	Y	T	A	G	H	N	R	A	T	N	D	N	N	Q	N	L	S	T	D	V
Omicron	S	L	N	N	K	A	F	F	R	S	R	Y	H	K	A	G	Y	K	H	A	T	K	Y	K	D	H	K	F	S	T	D	V
Omicron XBB 1.5	S	L	K	N	K	A	P	S	Q	G	R	Y	H	T	A	G	Y	K	H	A	T	K	Y	N	D	H	K	L	S	T	D	V
